# Supplementary material
Source: MDPI journal article supplement (https://www.mdpi.com/2311-5637/7/4/278)
Supplement: s1 [file s1]

# **Influence of Environmental Microbiota on the Activity and Metabolism of Starter Cultures USED in Coffee beans Fermentation**

Vanessa Bassi Pregolini<sup>1</sup>, Gilberto Vinícius de Melo Pereira<sup>2\*</sup>, Alexander da Silva Vale<sup>2</sup>, Dão Pedro de Carvalho Neto<sup>3</sup>, Carlos Ricardo Soccol<sup>2\*</sup>

<sup>1</sup> Departament of Bioprocess Engineering and Biotechnology, Federal Technological University of Paraná (UTFPR), Ponta Grossa 84017-220, PR, Brazil; vanepregolini@gmail.com (V.B.P.)

<sup>2</sup> Department of Bioprocess Engineering and Biotechnology, Federal University of Paraná (UFPR), Curitiba 81531-970, PR, Brazil; alexander.biotec@gmail.com

<sup>3</sup> Federal Institute of Education, Science and Technology of Paraná (IFPR), Londrina 86060-370, PR, Brazil; daopcn@gmail.com

\* Correspondence: gilbertovinicius@gmail.com (G.V.d.M.P.); soccol@ufpr.br (C.R.S.)

**Table S1:** Relative abundance (%) of fungi and bacteria detected in environmental samples collected from Brazil coffee plantations.

| Microorganism          | Soil  | Ground leaf | Fruit of the ground | Tree leaf | Tree cherry | Cherries before de-pulping | Over-ripe fruits | Depulped fruit | Water |
|------------------------|-------|-------------|---------------------|-----------|-------------|----------------------------|------------------|----------------|-------|
| <b><i>Fungi</i></b>    |       |             |                     |           |             |                            |                  |                |       |
| Saccharomycetales      | 3.10  | 0.04        | 21.44               | 3.29      | 1.33        | 27.33                      | 8.95             | 69.15          | 51.71 |
| <i>Cladosporium</i>    | 12.25 | 1.71        | 8.04                | 10.85     | 18.45       | 30.39                      | 7.28             | 0.34           | 31.05 |
| <i>Fusarium</i>        | 3.98  | 0.14        | 1.72                | 2.01      | 0.48        | 6.44                       | 65.59            | 0.13           | 3.03  |
| <i>Wickerhamomyces</i> | 0.93  | <0.01       | 0.57                | 0.15      | 0.07        | 7.46                       | 3.00             | 0.58           | 2.88  |
| <i>Torulaspora</i>     | 0.03  | -           | 0.57                | -         | 0.06        | 9.03                       | 2.62             | 12.42          | 2.67  |
| <i>Kazachstania</i>    | 0.03  | -           | 0.77                | -         | 0.07        | 2.32                       | 0.05             | 10.13          | 1.09  |
| Tremellales            | 0.06  | 4.36        | 0.67                | 0.51      | 1.18        | 2.67                       | 0.38             | 0.26           | 1.00  |
| <i>Kodamaea</i>        | -     | -           | 0.10                | -         | 0.02        | 0.71                       | 0.89             | 0.28           | 0.78  |
| Lecanoromycetes        | -     | -           | -                   | 55.89     | -           | -                          | -                | -              | -     |
| Other                  | 2.57  | 8.94        | 6.03                | 2.31      | 6.27        | 0.94                       | 0.29             | 0.18           | 0.66  |
| Dothideomycetes        | -     | -           | -                   | 0.77      | -           | -                          | -                | -              | -     |
| <i>Saccharomyces</i>   | -     | 0.14        | 0.29                | -         | 1.54        | 0.98                       | 0.73             | 1.56           | 0.65  |
| Pleosporales           | 25.15 | 31.28       | 3.44                | 1.49      | 9.18        | 0.59                       | 0.18             | 0.11           | 0.64  |
| <i>Candida</i>         | 4.06  | 0.75        | 39.81               | 1.03      | 2.58        | 4.99                       | 2.22             | 3.67           | 0.53  |
| Dothioraceae           | 0.03  | 0.11        | -                   | 1.75      | 0.38        | 0.08                       | 0.58             | 0.09           | 0.45  |
| <i>Didymella</i>       | 0.08  | 5.58        | 0.67                | 1.18      | 5.13        | 0.55                       | 0.01             | 0.03           | 0.44  |
| <i>Issatchenkia</i>    | -     | -           | 0.10                | -         | -           | 0.98                       | 0.85             | 0.03           | 0.41  |
| unidentified           | 2.23  | 0.05        | 1.53                | 6.84      | 1.26        | 0.55                       | 0.06             | 0.02           | 0.25  |
| Nectriaceae            | 0.28  | <0.01       | 0.38                | 0.15      | 0.15        | 0.20                       | 2.41             | <0.01          | 0.24  |
| Pleosporaceae          | 0.08  | 0.58        | 0.19                | 0.21      | 0.68        | 0.08                       | 0.02             | <0.01          | 0.21  |
| Mycosphaerellaceae     | 1.04  | 36.72       | 5.93                | 1.23      | 34.74       | 1.61                       | 1.97             | 0.10           | 0.15  |
| <i>Colletotrichum</i>  | 39.77 | 6.65        | 0.77                | 3.19      | 3.06        | 0.31                       | 0.43             | 0.05           | 0.13  |
| <i>Helicoma</i>        | -     | 0.44        | 1.05                | -         | 8.52        | -                          | 0.16             | <0.01          | 0.08  |
| <i>Citeromyce</i>      | -     | -           | -                   | -         | -           | -                          | 0.02             | -              | 0.08  |
| <i>Xylariales</i>      | -     | -           | -                   | -         | <0.01       | 0.20                       | 0.09             | -              | 0.07  |
| <i>Meyerozyma</i>      | -     | -           | -                   | -         | -           | 0.27                       | <0.01            | 0.38           | 0.07  |
| <i>Hanseniaspora</i>   | -     | -           | -                   | -         | -           | -                          | 0.01             | 0.06           | 0.06  |
| <i>Aureobasidium</i>   | -     | -           | -                   | -         | <0.01       | -                          | 0.04             | 0.02           | 0.05  |
| <i>Strelitziana</i>    | 0.03  | 1.14        | 0.19                | 0.36      | 2.29        | 0.04                       | 0.08             | <0.01          | 0.05  |
| <i>Starmerella</i>     | -     | -           | -                   | -         | -           | -                          | -                | -              | 0.05  |
| <i>Saturnispora</i>    | -     | -           | -                   | -         | -           | -                          | -                | 0.11           | 0.04  |
| Hypocreales            | 0.23  | -           | 0.48                | 0.41      | -           | 0.24                       | 0.08             | <0.01          | 0.04  |

[illegible]

|                          |      |       |      |      |       |      |       |       |       |
|--------------------------|------|-------|------|------|-------|------|-------|-------|-------|
| Parmeliaceae             | -    | -     | -    | -    | -     | -    | -     | -     | <0.01 |
| Pleomassariaceae         | 0.03 | -     | -    | -    | -     | -    | -     | -     | <0.01 |
| <i>Septobasidium</i>     | -    | -     | -    | -    | 0.12  | -    | -     | -     | <0.01 |
| Chaetosphaeriaceae       | 0.06 | 0.01  | -    | -    | <0.01 | -    | 0.01  | -     | <0.01 |
| Cryphonectriaceae        | -    | -     | -    | -    | -     | -    | 0.14  | -     | <0.01 |
| <i>Cryptococcus</i>      | -    | -     | -    | -    | -     | -    | -     | <0.01 | <0.01 |
| <i>Dioszegia</i>         | -    | -     | -    | -    | -     | -    | -     | -     | <0.01 |
| <i>Lecanorales</i>       | -    | -     | -    | -    | -     | -    | -     | -     | <0.01 |
| Magnaporthaceae          | -    | -     | -    | -    | -     | 0.04 | <0.01 | -     | <0.01 |
| <i>Malassezia</i>        | -    | -     | -    | -    | 0.03  | -    | <0.01 | -     | <0.01 |
| <i>Pichia</i>            | -    | -     | -    | -    | -     | -    | -     | <0.01 | <0.01 |
| <i>Stagonosporopsis</i>  | -    | -     | -    | -    | -     | -    | -     | -     | <0.01 |
| <i>Acarosporina</i>      | -    | -     | -    | -    | -     | 0.04 | 0.02  | -     | <0.01 |
| <i>Aplosporella</i>      | -    | -     | -    | -    | -     | -    | -     | -     | <0.01 |
| <i>Cantharellales</i>    | -    | -     | -    | 0.05 | 0.06  | -    | -     | -     | <0.01 |
| <i>Curvularia</i>        | 0.06 | -     | -    | 0.05 | -     | -    | <0.01 | -     | <0.01 |
| <i>Entoloma</i>          | -    | -     | -    | 0.05 | -     | -    | -     | -     | <0.01 |
| Lasiosphaeriaceae        | -    | <0.01 | -    | 0.10 | -     | -    | <0.01 | -     | <0.01 |
| <i>Microdochium</i>      | 0.06 | -     | 0.10 | -    | -     | -    | 0.03  | -     | <0.01 |
| <i>Myrothecium</i>       | -    | -     | -    | -    | -     | -    | -     | -     | <0.01 |
| <i>Phyllozoma</i>        | -    | -     | -    | 0.15 | -     | -    | -     | -     | <0.01 |
| <i>Rachicladosporium</i> | -    | -     | -    | -    | -     | -    | -     | -     | <0.01 |
| Venturiales              | -    | -     | -    | 0.05 | -     | -    | -     | -     | <0.01 |
| Agaricaceae              | -    | -     | 0.10 | -    | -     | -    | -     | -     | <0.01 |
| <i>Articulospora</i>     | -    | -     | -    | -    | -     | -    | -     | -     | <0.01 |
| <i>Buellia</i>           | -    | -     | -    | -    | -     | -    | -     | -     | <0.01 |
| <i>Bullera</i>           | -    | -     | -    | -    | -     | -    | -     | -     | <0.01 |
| <i>Chaetosphaeria</i>    | -    | -     | -    | 0.05 | -     | -    | -     | -     | <0.01 |
| <i>Chloridium</i>        | -    | -     | -    | -    | -     | -    | -     | -     | <0.01 |
| Choanephoraceae          | -    | -     | -    | -    | -     | -    | -     | -     | <0.01 |
| <i>Claroideoglossum</i>  | -    | -     | -    | 0.05 | -     | -    | -     | -     | <0.01 |
| Clavicipitaceae          | -    | -     | -    | -    | -     | -    | -     | -     | <0.01 |
| Coniochaetaceae          | -    | -     | -    | -    | 0.02  | -    | -     | -     | <0.01 |
| Coniochaetales           | -    | -     | -    | -    | -     | -    | -     | -     | <0.01 |
| Debaryomycetaceae        | -    | -     | -    | -    | -     | -    | -     | -     | <0.01 |
| <i>Diaporthe</i>         | -    | -     | -    | -    | -     | -    | 0.01  | -     | <0.01 |
| <i>Dictyosporium</i>     | -    | -     | -    | -    | -     | -    | -     | -     | <0.01 |
| Elsinoaceae              | -    | -     | -    | -    | -     | -    | -     | <0.01 | <0.01 |

|                          |      |       |      |      |       |      |       |       |       |
|--------------------------|------|-------|------|------|-------|------|-------|-------|-------|
| <i>Exophiala</i>         | -    | <0.01 | -    | -    | -     | 0.04 | -     | -     | <0.01 |
| <i>Gongronella</i>       | 0.03 | <0.01 | -    | -    | -     | -    | -     | -     | <0.01 |
| Helotiaceae              | -    | -     | -    | -    | -     | -    | -     | -     | <0.01 |
| Hyaloscyphaceae          | -    | -     | -    | -    | <0.01 | -    | <0.01 | -     | <0.01 |
| <i>Kwoniella</i>         | -    | -     | -    | -    | -     | -    | -     | -     | <0.01 |
| <i>Lecanicillium</i>     | -    | -     | -    | -    | -     | -    | -     | -     | <0.01 |
| <i>Lepiota</i>           | -    | -     | -    | -    | -     | -    | -     | -     | <0.01 |
| <i>Metacordyceps</i>     | -    | -     | -    | -    | -     | -    | -     | -     | <0.01 |
| <i>Metarhizium</i>       | -    | <0.01 | 0.10 | -    | -     | 0.04 | -     | -     | <0.01 |
| <i>Nakazawaea</i>        | -    | -     | -    | -    | -     | -    | -     | -     | <0.01 |
| <i>Phaeosphaeria</i>     | -    | <0.01 | -    | -    | -     | -    | -     | -     | <0.01 |
| Phaeosphaeriaceae        | -    | -     | -    | -    | 0.07  | -    | -     | -     | <0.01 |
| Physciaceae              | -    | -     | -    | -    | -     | -    | -     | -     | <0.01 |
| Pseudeurotiaceae         | -    | -     | -    | -    | -     | -    | 0.02  | <0.01 | <0.01 |
| <i>Pseudophialophora</i> | -    | -     | -    | -    | -     | -    | -     | -     | <0.01 |
| <i>Rhytidhysterion</i>   | -    | -     | -    | -    | -     | -    | -     | -     | <0.01 |
| Septobasidiaceae         | -    | -     | -    | -    | 0.05  | -    | -     | -     | <0.01 |
| Sporormiaceae            | 0.03 | -     | -    | 0.05 | -     | -    | -     | -     | <0.01 |
| Tubeufiaceae             | -    | -     | -    | 0.05 | -     | -    | <0.01 | -     | <0.01 |
| <i>Westerdykella</i>     | -    | <0.01 | -    | -    | -     | -    | -     | -     | <0.01 |
| <i>Sporidiobolales</i>   | -    | -     | -    | -    | -     | -    | 0.02  | -     | -     |
| <i>Subulicystidium</i>   | -    | -     | -    | -    | -     | -    | 0.01  | <0.01 | -     |
| Lindgomycetaceae         | -    | -     | 0.10 | -    | -     | -    | 0.01  | -     | -     |
| <i>Myrmecridium</i>      | -    | -     | -    | -    | -     | -    | 0.01  | -     | -     |
| <i>Paraglomerales</i>    | -    | -     | -    | -    | -     | -    | 0.01  | -     | -     |
| <i>Eurotiales</i>        | -    | -     | -    | -    | -     | -    | <0.01 | 0.02  | -     |
| Archaeosporaceae         | -    | -     | -    | -    | -     | -    | <0.01 | -     | -     |
| <i>Ophiostoma</i>        | -    | -     | -    | -    | -     | -    | <0.01 | -     | -     |
| <i>Rhizophlyctis</i>     | 0.06 | -     | -    | -    | -     | -    | <0.01 | -     | -     |
| Apiosporaceae            | -    | -     | -    | -    | -     | -    | <0.01 | -     | -     |
| <i>Atractiellales</i>    | -    | <0.01 | 0.10 | 0.05 | -     | -    | <0.01 | <0.01 | -     |
| <i>Glomerales</i>        | -    | -     | -    | 0.05 | -     | -    | -     | -     | -     |
| <i>Auricularia</i>       | -    | -     | -    | -    | -     | -    | <0.01 | -     | -     |
| <i>Auriculariales</i>    | -    | -     | -    | -    | -     | -    | <0.01 | -     | -     |
| Cordycipitaceae          | -    | -     | -    | -    | -     | -    | 0.02  | -     | -     |
| Diatrypaceae             | -    | -     | -    | -    | -     | 0.08 | <0.01 | -     | -     |
| <i>Glomus</i>            | -    | -     | -    | -    | -     | -    | <0.01 | -     | -     |
| <i>Hypholoma</i>         | -    | -     | -    | -    | -     | -    | <0.01 | -     | -     |

|                         |      |       |      |      |       |      |       |       |   |
|-------------------------|------|-------|------|------|-------|------|-------|-------|---|
| Ophiocordycipitaceae    | -    | -     | -    | -    | -     | -    | <0.01 | -     | - |
| <i>Paraglomus</i>       | -    | -     | 0.10 | -    | -     | -    | <0.01 | -     | - |
| <i>Periconia</i>        | -    | -     | -    | -    | -     | -    | <0.01 | <0.01 | - |
| <i>Scedosporium</i>     | -    | -     | -    | -    | -     | -    | <0.01 | -     | - |
| Strophariaceae          | -    | -     | -    | -    | -     | -    | <0.01 | -     | - |
| <i>Trechispora</i>      | -    | -     | -    | -    | -     | -    | <0.01 | -     | - |
| <i>Umbelopsis</i>       | -    | -     | -    | -    | -     | -    | <0.01 | -     | - |
| <i>Purpureocillium</i>  | 2.74 | 0.26  | 0.29 | 0.05 | 0.05  | 0.04 | -     | <0.01 | - |
| <i>Ceriporia</i>        | -    | -     | -    | -    | -     | -    | -     | <0.01 | - |
| <i>Ochroconis</i>       | -    | -     | -    | -    | -     | -    | -     | <0.01 | - |
| <i>Cercospora</i>       | -    | -     | -    | -    | 0.06  | -    | -     | <0.01 | - |
| <i>Cyberlindnera</i>    | -    | -     | -    | -    | -     | -    | -     | <0.01 | - |
| Microascaceae           | -    | -     | -    | -    | -     | -    | -     | <0.01 | - |
| <i>Phaeosphaeria</i>    | -    | -     | -    | 0.05 | -     | -    | -     | -     | - |
| <i>Thermomyces</i>      | -    | -     | -    | -    | -     | -    | -     | <0.01 | - |
| Microstromatales        | -    | -     | -    | -    | 0.11  | -    | -     | -     | - |
| <i>Tetraplospora</i>    | -    | -     | -    | -    | 0.06  | -    | -     | -     | - |
| <i>Symmetrospora</i>    | -    | -     | -    | -    | 0.04  | -    | -     | -     | - |
| <i>Annulohypoxylon</i>  | -    | -     | -    | -    | <0.01 | -    | -     | -     | - |
| Ganodermataceae         | 0.03 | -     | 0.19 | -    | <0.01 | -    | -     | -     | - |
| <i>Multiseptospora</i>  | -    | -     | -    | -    | <0.01 | -    | -     | -     | - |
| Phanerochaetaceae       | -    | 0.30  | -    | -    | -     | -    | -     | -     | - |
| Ceratobasidiaceae       | -    | <0.01 | -    | -    | -     | -    | -     | -     | - |
| Entolomataceae          | -    | <0.01 | 0.10 | -    | -     | -    | -     | -     | - |
| Herpotrichiellaceae     | -    | <0.01 | 0.10 | 0.15 | -     | -    | -     | -     | - |
| Sordariaceae            | -    | <0.01 | -    | -    | -     | -    | -     | -     | - |
| <i>Preussia</i>         | -    | -     | -    | -    | -     | 0.04 | -     | -     | - |
| <i>Diversispora</i>     | 0.08 | -     | 0.10 | 0.05 | -     | -    | -     | -     | - |
| Glomerellaceae          | 0.03 | -     | -    | -    | -     | -    | -     | -     | - |
| <i>Pestalotiopsis</i>   | 0.03 | -     | 0.10 | -    | -     | -    | -     | -     | - |
| <i>Verticillium</i>     | 0.03 | -     | -    | -    | -     | -    | -     | -     | - |
| <i>Pseudocercospora</i> | -    | -     | -    | 0.41 | -     | -    | -     | -     | - |
| <i>Sordariomycetes</i>  | -    | -     | -    | 0.41 | -     | -    | -     | -     | - |
| <i>Conlarium</i>        | -    | -     | 0.19 | 0.10 | -     | -    | -     | -     | - |
| <i>Hypotrachyna</i>     | -    | -     | -    | 0.05 | -     | -    | -     | -     | - |
| <i>Agaricomycetes</i>   | -    | -     | -    | 0.05 | -     | -    | -     | -     | - |
| <i>Monographella</i>    | -    | -     | -    | 0.05 | -     | -    | -     | -     | - |
| Orbiliaceae             | -    | -     | -    | 0.05 | -     | -    | -     | -     | - |

|                         |       |       |       |       |       |       |       |       |       |
|-------------------------|-------|-------|-------|-------|-------|-------|-------|-------|-------|
| <i>Scytalidium</i>      | -     | -     | -     | 0.05  | -     | -     | -     | -     | -     |
| <i>Castanediella</i>    | -     | -     | 0.19  | -     | -     | -     | -     | -     | -     |
| <i>Clitopilus</i>       | -     | -     | 0.10  | -     | -     | -     | -     | -     | -     |
| <i>Ganoderma</i>        | -     | -     | 0.10  | -     | -     | -     | -     | -     | -     |
| <i>Lycoperdon</i>       | -     | -     | 0.10  | -     | -     | -     | -     | -     | -     |
| Psathyrellaceae         | -     | -     | 0.10  | -     | -     | -     | -     | -     | -     |
| <b>Bacteria</b>         |       |       |       |       |       |       |       |       |       |
| Enterobacteriaceae      | 2.30  | 24.05 | 43.77 | 2.77  | 47.00 | 35.58 | 50.70 | 61.72 | 30.02 |
| Erwinia                 | 0.80  | 16.61 | 39.97 | 2.88  | 1.91  | 0.37  | 47.01 | 2.54  | 23.24 |
| Leuconostocaceae        | -     | 0.01  | 7.94  | 0.18  | 0.73  | 6.68  | 1.21  | 1.56  | 12.85 |
| <i>Lactococcus</i>      | 0.23  | 0.89  | 0.01  | 10.83 | 0.19  | 0.10  | -     | 1.56  | 0.35  |
| <i>Leuconostoc</i>      | 0.23  | 0.03  | 5.88  | -     | 5.46  | 53.49 | 0.15  | 20.24 | 25.61 |
| <i>Fructobacillus</i>   | -     | <0.01 | 1.53  | -     | 0.05  | 1.28  | 0.22  | 0.11  | 6.46  |
| Acetobacteraceae        | 0.43  | 0.07  | <0.01 | 0.12  | 0.81  | 0.03  | 0.02  | -     | 0.01  |
| <i>Methylobacterium</i> | 1.74  | 0.41  | 0.04  | 34.79 | 6.57  | 0.14  | 0.06  | 0.23  | 0.03  |
| <i>Amycolatopsis</i>    | 18.33 | -     | <0.01 | -     | -     | -     | -     | -     | -     |
| <i>Yaniella</i>         | <0.01 | 0.02  | 0.01  | 0.24  | 0.03  | 0.02  | <0.01 | <0.01 | <0.01 |
| <i>Acetobacter</i>      | -     | -     | 0.02  | -     | -     | 0.06  | 0.01  | 0.84  | 0.06  |
| <i>Gluconobacter</i>    | -     | -     | 0.05  | -     | 0.02  | 0.02  | <0.01 | 0.05  | <0.01 |
| <i>Pediococcus</i>      | 0.34  | <0.01 | 0.04  | 0.77  | 0.02  | 0.20  | 0.02  | 4.70  | 0.20  |
| Lactobacillaceae        | -     | -     | <0.01 | 0.06  | -     | 0.02  | <0.01 | 0.67  | 0.05  |
| <i>Lactobacillus</i>    | 0.52  | 0.07  | 0.06  | 7.65  | 0.32  | 0.66  | 0.05  | 1.84  | 0.23  |
| <i>Weissella</i>        | -     | -     | 0.04  | -     | -     | 0.18  | -     | -     | 0.21  |
| <i>Pantoea</i>          | 0.02  | 0.20  | 0.15  | 0.06  | 0.02  | -     | 0.17  | 0.01  | 0.12  |
| <i>Staphylococcus</i>   | 0.53  | 0.09  | 0.06  | 1.71  | 0.68  | 0.11  | 0.04  | 0.12  | 0.02  |
| <i>Enterococcus</i>     | 0.03  | 0.03  | <0.01 | 2.06  | -     | -     | -     | <0.01 | 0.02  |
| <i>Pseudomonas</i>      | 2.15  | 16.47 | 0.02  | 3.59  | 0.24  | 0.03  | -     | 0.05  | 0.03  |
| Methylocystaceae        | -     | -     | -     | 2.00  | 0.69  | 0.01  | -     | -     | -     |
| Ruminococcaceae         | 1.45  | -     | 0.01  | 0.29  | 1.83  | <0.01 | <0.01 | 0.02  | <0.01 |
| <i>Kaistobacter</i>     | 2.60  | 0.01  | <0.01 | -     | 0.25  | -     | 0.01  | -     | <0.01 |
| Beijerinckiaceae        | 0.93  | -     | <0.01 | 7.12  | 0.13  | <0.01 | -     | -     | -     |
| <i>Clostridium</i>      | -     | -     | -     | -     | 0.02  | -     | <0.01 | 0.03  | -     |
| Gemmataceae             | 2.12  | -     | <0.01 | -     | -     | -     | -     | -     | <0.01 |
| Erythrobacteraceae      | 1.83  | 0.03  | <0.01 | -     | -     | -     | -     | -     | <0.01 |
| Sphingomonadaceae       | -     | 0.59  | 0.03  | 0.88  | 2.75  | 0.06  | 0.02  | -     | -     |
| <i>Sphingomonas</i>     | 0.93  | 2.23  | 0.02  | 2.71  | 4.42  | 0.11  | <0.01 | 0.08  | 0.05  |
| <i>Bacillus</i>         | 1.08  | 0.04  | -     | 0.53  | 0.20  | -     | -     | 0.05  | <0.01 |
| <i>Alloiococcus</i>     | 0.17  | -     | -     | -     | 0.22  | -     | -     | 0.06  | -     |

|                                  |      |       |       |      |       |       |       |      |       |
|----------------------------------|------|-------|-------|------|-------|-------|-------|------|-------|
| Pseudomonadaceae                 | -    | 0.25  | -     | 1.65 | 1.67  | 0.05  | -     | 0.57 | <0.01 |
| <i>Novosphingobium</i>           | 0.30 | 2.64  | 0.02  | 0.29 | 1.27  | 0.08  | 0.01  | -    | <0.01 |
| <i>Gemmata</i>                   | 1.14 | -     | -     | -    | 0.04  | <0.01 | -     | 0.05 | -     |
| <i>Sphingobacterium</i>          | -    | 3.17  | 0.02  | 0.29 | -     | -     | -     | -    | <0.01 |
| Solirubrobacteraceae             | 3.64 | -     | -     | 0.12 | -     | <0.01 | -     | -    | <0.01 |
| Comamonadaceae                   | 1.37 | 1.05  | <0.01 | 0.06 | 0.56  | 0.02  | 0.01  | 0.14 | 0.02  |
| <i>Chryseobacterium</i>          | 0.25 | 2.42  | -     | 0.12 | 0.12  | <0.01 | -     | -    | 0.01  |
| <i>Luteibacter</i>               | 0.08 | 0.02  | -     | -    | 0.32  | 0.01  | -     | -    | <0.01 |
| Micrococcaceae                   | 1.37 | <0.01 | -     | 0.24 | 0.10  | <0.01 | -     | -    | -     |
| Oxalobacteraceae                 | 0.43 | 1.60  | -     | 0.18 | 0.10  | -     | -     | -    | <0.01 |
| <i>Bradyrhizobium</i>            | 0.72 | 0.01  | -     | 1.71 | -     | -     | -     | -    | -     |
| Nocardiodaceae                   | 4.50 | -     | -     | 0.18 | 0.10  | -     | 0.01  | -    | -     |
| <i>Agrobacterium</i>             | 1.39 | 9.42  | 0.01  | 0.47 | 0.60  | 0.05  | -     | 0.05 | 0.01  |
| Chitinophagaceae                 | 1.20 | 0.01  | <0.01 | 0.47 | 0.49  | <0.01 | -     | -    | -     |
| Gaiellaceae                      | 1.78 | -     | -     | 0.29 | -     | -     | -     | -    | -     |
| Rhodospirillaceae                | 1.27 | <0.01 | -     | -    | -     | -     | -     | -    | -     |
| <i>Pedobacter</i>                | 1.10 | 5.02  | -     | 0.06 | -     | 0.01  | <0.01 | -    | <0.01 |
| <i>Actinomyces</i>               | 0.49 | 0.02  | -     | 1.06 | 1.13  | <0.01 | -     | -    | -     |
| <i>Rhodoplanes</i>               | 3.04 | <0.01 | -     | -    | -     | -     | -     | -    | -     |
| <i>Phormidium</i>                | 1.37 | 0.02  | -     | -    | -     | -     | -     | -    | -     |
| <i>Stenotrophomonas</i>          | 0.43 | 3.46  | 0.01  | -    | -     | 0.02  | -     | 0.05 | <0.01 |
| <i>Paenibacillus</i>             | 0.43 | -     | <0.01 | -    | 1.30  | 0.01  | 0.02  | 1.13 | -     |
| <i>Prevotella</i>                | -    | -     | -     | -    | 1.19  | -     | -     | 0.64 | <0.01 |
| Rikenellaceae                    | 0.09 | -     | -     | 0.06 | 1.13  | <0.01 | -     | 0.04 | -     |
| Microbacteriaceae                | 0.08 | 1.15  | -     | 0.82 | -     | 0.01  | -     | -    | <0.01 |
| Aurantimonadaceae                | 0.24 | 0.11  | -     | 0.41 | 1.06  | 0.02  | 0.01  | 0.09 | 0.01  |
| <i>Hymenobacter</i>              | 0.22 | 0.04  | -     | 0.71 | 1.93  | -     | <0.01 | -    | -     |
| Paenibacillaceae                 | 0.03 | 1.03  | -     | 0.12 | -     | -     | -     | -    | <0.01 |
| Sphingobacteriaceae              | 4.02 | 0.55  | -     | -    | 0.09  | 0.03  | -     | -    | 0.05  |
| Dolo_23                          | 1.78 | -     | -     | -    | -     | -     | -     | -    | <0.01 |
| Pseudanabaenaceae                | 1.45 | -     | -     | -    | -     | -     | -     | -    | -     |
| Geodermatophilaceae              | 0.87 | <0.01 | -     | 0.12 | 0.03  | -     | -     | -    | -     |
| <i>Candidatus Nitrososphaera</i> | 0.87 | -     | -     | -    | -     | -     | -     | -    | -     |
| <i>Modestobacter</i>             | 0.75 | -     | -     | -    | -     | -     | -     | -    | -     |
| <i>Geodermatophilus</i>          | 0.71 | -     | -     | -    | 0.71  | -     | -     | -    | -     |
| Patulibacteraceae                | 0.71 | 0.01  | -     | -    | -     | -     | -     | -    | -     |
| <i>Pseudonocardia</i>            | 0.71 | -     | -     | -    | -     | -     | -     | -    | -     |
| <i>Nocardioideae</i>             | 0.70 | <0.01 | -     | -    | <0.01 | -     | -     | -    | -     |



|                         |      |       |       |      |       |       |       |       |       |
|-------------------------|------|-------|-------|------|-------|-------|-------|-------|-------|
| Conexibacteraceae       | 0.67 | -     | -     | -    | -     | -     | -     | -     | -     |
| DA101                   | 0.63 | -     | -     | -    | -     | -     | -     | -     | -     |
| <i>Bdellovibrio</i>     | 0.55 | 0.03  | -     | 0.29 | -     | -     | -     | -     | <0.01 |
| Micromonosporaceae      | 0.52 | -     | -     | -    | 0.19  | -     | -     | -     | -     |
| <i>Burkholderia</i>     | 0.47 | 0.03  | 0.04  | -    | 0.28  | <0.01 | -     | -     | -     |
| Xanthomonadaceae        | 0.44 | 0.11  | <0.01 | -    | -     | 0.05  | -     | 0.04  | -     |
| Intrasporangiaceae      | 0.44 | -     | <0.01 | -    | -     | -     | -     | -     | -     |
| <i>Balneimonas</i>      | 0.42 | -     | -     | -    | -     | -     | -     | -     | <0.01 |
| <i>Streptococcus</i>    | 0.41 | 0.01  | <0.01 | 0.65 | 0.41  | -     | -     | 0.09  | -     |
| Bradyrhizobiaceae       | 0.40 | <0.01 | -     | 0.35 | 0.10  | 0.01  | <0.01 | -     | <0.01 |
| EB1017                  | 0.40 | -     | -     | -    | -     | -     | -     | -     | -     |
| <i>Segetibacter</i>     | 0.37 | -     | -     | -    | -     | -     | -     | -     | -     |
| Coxiellaceae            | 0.37 | -     | -     | -    | -     | -     | -     | -     | -     |
| Sporichthyaceae         | 0.35 | -     | -     | 0.18 | -     | -     | -     | -     | -     |
| <i>Ralstonia</i>        | 0.34 | -     | -     | -    | -     | -     | -     | 0.02  | -     |
| <i>Aeromicrobium</i>    | 0.34 | 0.03  | -     | -    | -     | <0.01 | -     | -     | -     |
| mb2424                  | 0.34 | -     | -     | -    | <0.01 | -     | -     | -     | -     |
| <i>Rubellimicrobium</i> | 0.33 | -     | -     | -    | -     | -     | -     | -     | -     |
| <i>Sphingobium</i>      | 0.32 | 0.26  | 0.01  | 0.65 | 0.54  | <0.01 | -     | -     | <0.01 |
| <i>Faecalibacterium</i> | 0.31 | -     | -     | 0.12 | 0.38  | <0.01 | <0.01 | 0.05  | -     |
| Syntrophobacteraceae    | 0.31 | -     | -     | -    | -     | -     | -     | -     | -     |
| Ellin5301               | 0.29 | -     | -     | -    | -     | -     | -     | -     | -     |
| <i>Bacteroides</i>      | 0.28 | <0.01 | 0.02  | -    | 0.10  | <0.01 | -     | <0.01 | -     |
| <i>Planctomyces</i>     | 0.28 | -     | -     | -    | -     | -     | -     | -     | -     |
| Ellin506                | 0.28 | -     | -     | -    | 0.08  | 0.02  | -     | -     | -     |
| [Ruminococcus]          | 0.27 | 0.01  | <0.01 | 0.65 | 0.62  | <0.01 | <0.01 | <0.01 | <0.01 |
| Clostridiaceae          | 0.26 | -     | -     | -    | 0.40  | <0.01 | <0.01 | -     | -     |
| <i>Mycobacterium</i>    | 0.25 | -     | -     | -    | 0.03  | -     | -     | -     | -     |
| RB40                    | 0.25 | -     | -     | -    | -     | -     | -     | -     | -     |
| Afifella                | 0.25 | -     | -     | -    | -     | -     | -     | -     | -     |
| C111                    | 0.24 | -     | -     | -    | -     | -     | -     | -     | -     |
| <i>Flavisolibacter</i>  | 0.23 | -     | -     | -    | -     | -     | -     | -     | <0.01 |
| Ellin6075               | 0.23 | -     | <0.01 | -    | 0.08  | -     | -     | -     | <0.01 |
| Hyphomicrobiaceae       | 0.23 | -     | -     | -    | -     | -     | 0.01  | -     | -     |
| <i>Phycococcus</i>      | 0.22 | -     | -     | -    | -     | -     | -     | -     | -     |
| <i>Virgisporangium</i>  | 0.22 | -     | -     | -    | -     | -     | -     | -     | -     |
| Methylobacteriaceae     | 0.21 | 0.01  | -     | 0.71 | 0.30  | -     | 0.02  | -     | <0.01 |
| <i>Rubrobacter</i>      | 0.21 | -     | -     | -    | -     | -     | -     | -     | -     |

|                         |      |       |       |      |      |       |       |       |       |
|-------------------------|------|-------|-------|------|------|-------|-------|-------|-------|
| [Kouleothrixaceae]      | 0.20 | -     | -     | -    | -    | -     | -     | -     | -     |
| AK1AB1_02E              | 0.20 | -     | -     | -    | -    | -     | -     | -     | -     |
| <i>Enhydrobacter</i>    | 0.20 | -     | -     | -    | 0.22 | -     | -     | -     | -     |
| <i>Lysobacter</i>       | 0.20 | -     | -     | -    | -    | -     | -     | -     | <0.01 |
| <i>Fimbriimonas</i>     | 0.19 | -     | -     | -    | 0.23 | -     | -     | -     | -     |
| Haliangiaceae           | 0.19 | -     | -     | -    | -    | <0.01 | -     | -     | -     |
| <i>Chthonomonas</i>     | 0.16 | -     | -     | -    | -    | -     | -     | -     | -     |
| Bacillaceae             | 0.15 | 0.02  | 0.02  | 0.47 | 0.27 | 0.05  | 0.05  | 0.01  | <0.01 |
| <i>Legionella</i>       | 0.15 | -     | -     | -    | -    | -     | -     | -     | -     |
| <i>Blautia</i>          | 0.15 | 0.02  | -     | -    | 0.50 | <0.01 | -     | -     | -     |
| Isosphaeraceae          | 0.14 | -     | -     | -    | -    | -     | -     | -     | -     |
| <i>Leptolyngbya</i>     | 0.14 | -     | -     | -    | -    | -     | -     | -     | -     |
| Pseudonocardiaceae      | 0.13 | -     | -     | -    | -    | -     | -     | -     | -     |
| <i>Pedomicrobium</i>    | 0.13 | -     | -     | -    | 0.14 | -     | -     | -     | -     |
| <i>Hylemonella</i>      | 0.12 | 0.23  | -     | -    | 0.06 | <0.01 | 0.02  | -     | <0.01 |
| <i>Chthoniobacter</i>   | 0.12 | -     | -     | -    | -    | -     | -     | -     | -     |
| CM44                    | 0.12 | -     | -     | -    | -    | -     | -     | -     | -     |
| <i>Devosia</i>          | 0.12 | 0.01  | -     | 0.06 | 0.15 | <0.01 | -     | 0.03  | <0.01 |
| <i>Oscillospira</i>     | 0.12 | -     | <0.01 | -    | 0.62 | <0.01 | <0.01 | 0.02  | -     |
| [Entothionellaceae]     | 0.12 | -     | -     | -    | -    | -     | -     | -     | -     |
| <i>Corynebacterium</i>  | 0.12 | 0.03  | 0.01  | 0.18 | 0.22 | 0.03  | -     | 0.01  | <0.01 |
| <i>Faecalibacterium</i> | 0.31 | -     | -     | 0.12 | 0.38 | <0.01 | <0.01 | 0.05  | -     |
| Syntrophobacteriaceae   | 0.31 | -     | -     | -    | -    | -     | -     | -     | -     |
| Ellin5301               | 0.29 | -     | -     | -    | -    | -     | -     | -     | -     |
| <i>Bacteroides</i>      | 0.28 | <0.01 | 0.02  | -    | 0.10 | <0.01 | -     | <0.01 | -     |
| <i>Planctomyces</i>     | 0.28 | -     | -     | -    | -    | -     | -     | -     | -     |
| Ellin506                | 0.28 | -     | -     | -    | 0.08 | 0.02  | -     | -     | -     |
| [Ruminococcus]          | 0.27 | 0.01  | <0.01 | 0.65 | 0.62 | <0.01 | <0.01 | <0.01 | <0.01 |
| Clostridiaceae          | 0.26 | -     | -     | -    | 0.40 | <0.01 | <0.01 | -     | -     |
| <i>Mycobacterium</i>    | 0.25 | -     | -     | -    | 0.03 | -     | -     | -     | -     |
| RB40                    | 0.25 | -     | -     | -    | -    | -     | -     | -     | -     |
| <i>Aififella</i>        | 0.25 | -     | -     | -    | -    | -     | -     | -     | -     |
| C111                    | 0.24 | -     | -     | -    | -    | -     | -     | -     | -     |
| <i>Flavisolibacter</i>  | 0.23 | -     | -     | -    | -    | -     | -     | -     | <0.01 |
| Ellin6075               | 0.23 | -     | <0.01 | -    | 0.08 | -     | -     | -     | <0.01 |
| Hyphomicrobiaceae       | 0.23 | -     | -     | -    | -    | -     | 0.01  | -     | -     |
| <i>Phycicoccus</i>      | 0.22 | -     | -     | -    | -    | -     | -     | -     | -     |
| <i>Virgisporangium</i>  | 0.22 | -     | -     | -    | -    | -     | -     | -     | -     |

|                              |      |      |       |      |      |       |       |       |       |
|------------------------------|------|------|-------|------|------|-------|-------|-------|-------|
| Methylobacteriaceae          | 0.21 | 0.01 | -     | 0.71 | 0.30 | -     | 0.02  | -     | <0.01 |
| <i>Rubrobacter</i>           | 0.21 | -    | -     | -    | -    | -     | -     | -     | -     |
| [Kouleothrixaceae]           | 0.20 | -    | -     | -    | -    | -     | -     | -     | -     |
| AK1AB1_02E                   | 0.20 | -    | -     | -    | -    | -     | -     | -     | -     |
| <i>Enhydrobacter</i>         | 0.20 | -    | -     | -    | 0.22 | -     | -     | -     | -     |
| <i>Lysobacter</i>            | 0.20 | -    | -     | -    | -    | -     | -     | -     | <0.01 |
| <i>Fimbriimonas</i>          | 0.19 | -    | -     | -    | 0.23 | -     | -     | -     | -     |
| Haliangiaceae                | 0.19 | -    | -     | -    | -    | <0.01 | -     | -     | -     |
| <i>Chthonomonas</i>          | 0.16 | -    | -     | -    | -    | -     | -     | -     | -     |
| Bacillaceae                  | 0.15 | 0.02 | 0.02  | 0.47 | 0.27 | 0.05  | 0.05  | 0.01  | <0.01 |
| <i>Legionella</i>            | 0.15 | -    | -     | -    | -    | -     | -     | -     | -     |
| <i>Blautia</i>               | 0.15 | 0.02 | -     | -    | 0.50 | <0.01 | -     | -     | -     |
| Isosphaeraceae               | 0.14 | -    | -     | -    | -    | -     | -     | -     | -     |
| <i>Leptolyngbya</i>          | 0.14 | -    | -     | -    | -    | -     | -     | -     | -     |
| Pseudonocardiaceae           | 0.13 | -    | -     | -    | -    | -     | -     | -     | -     |
| <i>Pedomicrobium</i>         | 0.13 | -    | -     | -    | 0.14 | -     | -     | -     | -     |
| <i>Hylemonella</i>           | 0.12 | 0.23 | -     | -    | 0.06 | <0.01 | 0.02  | -     | <0.01 |
| <i>Chthoniobacter</i>        | 0.12 | -    | -     | -    | -    | -     | -     | -     | -     |
| CM44                         | 0.12 | -    | -     | -    | -    | -     | -     | -     | -     |
| <i>Devosia</i>               | 0.12 | 0.01 | -     | 0.06 | 0.15 | <0.01 | -     | 0.03  | <0.01 |
| <i>Oscillospira</i>          | 0.12 | -    | <0.01 | -    | 0.62 | <0.01 | <0.01 | 0.02  | -     |
| [Entotheonellaceae]          | 0.12 | -    | -     | -    | -    | -     | -     | -     | -     |
| <i>Corynebacterium</i>       | 0.12 | 0.03 | 0.01  | 0.18 | 0.22 | 0.03  | -     | 0.01  | <0.01 |
| 5B-12                        | 0.11 | -    | -     | -    | -    | -     | -     | -     | -     |
| Ellin517                     | 0.11 | -    | -     | -    | -    | -     | -     | -     | -     |
| <i>Microcoleus</i>           | 0.11 | -    | -     | -    | -    | -     | -     | -     | -     |
| <i>Ruminococcus</i>          | 0.11 | -    | -     | -    | 0.15 | <0.01 | -     | -     | -     |
| Caulobacteraceae             | 0.11 | 0.46 | -     | -    | -    | -     | -     | 0.02  | <0.01 |
| <i>Catellatospora</i>        | 0.11 | -    | -     | -    | -    | -     | -     | -     | -     |
| <i>Acinetobacter</i>         | 0.10 | -    | -     | 0.12 | 0.09 | <0.01 | -     | 0.12  | <0.01 |
| <i>Adhaeribacter</i>         | 0.10 | -    | -     | -    | -    | -     | -     | -     | -     |
| <i>Candidatus Koribacter</i> | 0.10 | -    | -     | -    | -    | -     | -     | -     | -     |
| FFCH4570                     | 0.10 | -    | -     | -    | -    | -     | -     | -     | -     |
| OM27                         | 0.10 | -    | -     | -    | -    | -     | -     | -     | -     |
| <i>Spirosoma</i>             | 0.10 | 0.03 | -     | -    | 0.42 | -     | -     | -     | <0.01 |
| <i>Truepera</i>              | 0.10 | -    | -     | -    | -    | -     | -     | -     | -     |
| A17                          | 0.09 | -    | -     | -    | -    | -     | -     | -     | -     |
| <i>Brachybacterium</i>       | 0.09 | 0.03 | 0.02  | 0.35 | 0.05 | 0.02  | <0.01 | <0.01 | <0.01 |

|                              |      |       |      |      |       |       |       |       |       |
|------------------------------|------|-------|------|------|-------|-------|-------|-------|-------|
| <i>Nitrospira</i>            | 0.09 | -     | -    | -    | -     | -     | -     | -     | -     |
| <i>Pseudoxanthomonas</i>     | 0.09 | <0.01 | -    | -    | -     | -     | -     | -     | -     |
| <i>Sediminibacterium</i>     | 0.09 | -     | -    | -    | -     | <0.01 | -     | -     | <0.01 |
| <i>Sporichthya</i>           | 0.09 | -     | -    | -    | -     | -     | -     | -     | -     |
| <i>Terracoccus</i>           | 0.09 | -     | -    | -    | -     | -     | -     | -     | -     |
| <i>Dermacoccus</i>           | 0.09 | -     | -    | -    | 0.10  | -     | -     | -     | -     |
| <i>Brevibacterium</i>        | 0.09 | 0.04  | 0.02 | 0.24 | 0.02  | 0.02  | <0.01 | <0.01 | 0.01  |
| Koribacteraceae              | 0.09 | -     | -    | -    | -     | -     | -     | -     | -     |
| Nostocaceae                  | 0.09 | -     | -    | -    | 0.13  | -     | -     | -     | -     |
| <i>Salinibacterium</i>       | 0.09 | 0.02  | -    | 0.06 | -     | -     | -     | -     | -     |
| <i>Arthrobacter</i>          | 0.08 | -     | -    | -    | <0.01 | -     | -     | -     | -     |
| Bacteriovoracaceae           | 0.08 | -     | -    | -    | -     | -     | -     | -     | -     |
| FFCH7168                     | 0.08 | -     | -    | -    | -     | -     | -     | -     | -     |
| <i>Hyphomicrobium</i>        | 0.08 | -     | -    | -    | -     | -     | -     | -     | -     |
| <i>Polaromonas</i>           | 0.08 | <0.01 | -    | -    | 0.05  | -     | <0.01 | -     | -     |
| <i>Massilia</i>              | 0.08 | 0.03  | -    | 0.06 | -     | -     | -     | 0.02  | -     |
| <i>Methylopila</i>           | 0.08 | -     | -    | -    | -     | -     | -     | -     | -     |
| <i>Mycoplasma</i>            | 0.08 | -     | -    | -    | -     | -     | -     | -     | -     |
| <i>Rubricoccus</i>           | 0.08 | -     | -    | -    | -     | -     | -     | -     | -     |
| Sinobacteraceae              | 0.08 | -     | -    | -    | -     | -     | -     | -     | -     |
| <i>Chloronema</i>            | 0.07 | -     | -    | -    | -     | -     | -     | -     | -     |
| Neisseriaceae                | 0.07 | -     | -    | -    | 0.09  | -     | -     | -     | -     |
| <i>Phenylobacterium</i>      | 0.07 | -     | -    | -    | -     | -     | -     | -     | <0.01 |
| <i>Pirellula</i>             | 0.07 | -     | -    | -    | -     | -     | -     | -     | -     |
| <i>Streptomyces</i>          | 0.07 | -     | -    | -    | -     | -     | -     | -     | -     |
| 5B-12                        | 0.11 | -     | -    | -    | -     | -     | -     | -     | -     |
| Ellin517                     | 0.11 | -     | -    | -    | -     | -     | -     | -     | -     |
| <i>Microcoleus</i>           | 0.11 | -     | -    | -    | -     | -     | -     | -     | -     |
| <i>Ruminococcus</i>          | 0.11 | -     | -    | -    | 0.15  | <0.01 | -     | -     | -     |
| Caulobacteraceae             | 0.11 | 0.46  | -    | -    | -     | -     | -     | 0.02  | <0.01 |
| <i>Catellatospora</i>        | 0.11 | -     | -    | -    | -     | -     | -     | -     | -     |
| <i>Acinetobacter</i>         | 0.10 | -     | -    | 0.12 | 0.09  | <0.01 | -     | 0.12  | <0.01 |
| <i>Adhaeribacter</i>         | 0.10 | -     | -    | -    | -     | -     | -     | -     | -     |
| <i>Candidatus Koribacter</i> | 0.10 | -     | -    | -    | -     | -     | -     | -     | -     |
| FFCH4570                     | 0.10 | -     | -    | -    | -     | -     | -     | -     | -     |
| OM27                         | 0.10 | -     | -    | -    | -     | -     | -     | -     | -     |
| <i>Spirosoma</i>             | 0.10 | 0.03  | -    | -    | 0.42  | -     | -     | -     | <0.01 |
| <i>Truepera</i>              | 0.10 | -     | -    | -    | -     | -     | -     | -     | -     |

|                          |      |       |       |      |       |       |       |       |       |
|--------------------------|------|-------|-------|------|-------|-------|-------|-------|-------|
| A17                      | 0.09 | -     | -     | -    | -     | -     | -     | -     | -     |
| <i>Brachybacterium</i>   | 0.09 | 0.03  | 0.02  | 0.35 | 0.05  | 0.02  | <0.01 | <0.01 | <0.01 |
| <i>Nitrospira</i>        | 0.09 | -     | -     | -    | -     | -     | -     | -     | -     |
| <i>Pseudoxanthomonas</i> | 0.09 | <0.01 | -     | -    | -     | -     | -     | -     | -     |
| <i>Sediminibacterium</i> | 0.09 | -     | -     | -    | -     | <0.01 | -     | -     | <0.01 |
| <i>Sporichthya</i>       | 0.09 | -     | -     | -    | -     | -     | -     | -     | -     |
| <i>Terracoccus</i>       | 0.09 | -     | -     | -    | -     | -     | -     | -     | -     |
| <i>Dermacoccus</i>       | 0.09 | -     | -     | -    | 0.10  | -     | -     | -     | -     |
| <i>Brevibacterium</i>    | 0.09 | 0.04  | 0.02  | 0.24 | 0.02  | 0.02  | <0.01 | <0.01 | 0.01  |
| Koribacteraceae          | 0.09 | -     | -     | -    | -     | -     | -     | -     | -     |
| Nostocaceae              | 0.09 | -     | -     | -    | 0.13  | -     | -     | -     | -     |
| <i>Salinibacterium</i>   | 0.09 | 0.02  | -     | 0.06 | -     | -     | -     | -     | -     |
| <i>Arthrobacter</i>      | 0.08 | -     | -     | -    | <0.01 | -     | -     | -     | -     |
| Bacteriovoraceae         | 0.08 | -     | -     | -    | -     | -     | -     | -     | -     |
| FFCH7168                 | 0.08 | -     | -     | -    | -     | -     | -     | -     | -     |
| <i>Hyphomicrobium</i>    | 0.08 | -     | -     | -    | -     | -     | -     | -     | -     |
| <i>Polaromonas</i>       | 0.08 | <0.01 | -     | -    | 0.05  | -     | <0.01 | -     | -     |
| <i>Massilia</i>          | 0.08 | 0.03  | -     | 0.06 | -     | -     | -     | 0.02  | -     |
| <i>Methylopila</i>       | 0.08 | -     | -     | -    | -     | -     | -     | -     | -     |
| <i>Mycoplasma</i>        | 0.08 | -     | -     | -    | -     | -     | -     | -     | -     |
| <i>Rubricoccus</i>       | 0.08 | -     | -     | -    | -     | -     | -     | -     | -     |
| Sinobacteraceae          | 0.08 | -     | -     | -    | -     | -     | -     | -     | -     |
| <i>Chloronema</i>        | 0.07 | -     | -     | -    | -     | -     | -     | -     | -     |
| Neisseriaceae            | 0.07 | -     | -     | -    | 0.09  | -     | -     | -     | -     |
| <i>Phenylobacterium</i>  | 0.07 | -     | -     | -    | -     | -     | -     | -     | <0.01 |
| <i>Pirellula</i>         | 0.07 | -     | -     | -    | -     | -     | -     | -     | -     |
| <i>Streptomyces</i>      | 0.07 | -     | -     | -    | -     | -     | -     | -     | -     |
| Thiobacillus             | 0.07 | -     | -     | -    | -     | -     | -     | -     | -     |
| Armatimonadaceae         | 0.06 | -     | -     | 0.18 | 0.01  | <0.01 | -     | -     | -     |
| <i>Leptotrichia</i>      | 0.06 | -     | -     | -    | -     | -     | -     | -     | -     |
| Moraxellaceae            | 0.06 | -     | -     | -    | -     | -     | -     | -     | -     |
| Rhizobiaceae             | 0.06 | 0.02  | -     | -    | 0.16  | 0.02  | -     | -     | <0.01 |
| Phyllobacteriaceae       | 0.06 | 0.19  | <0.01 | -    | -     | <0.01 | -     | -     | -     |
| [Chthoniobacteraceae]    | 0.06 | -     | -     | -    | -     | -     | 0.02  | -     | -     |
| A4b                      | 0.06 | -     | -     | -    | -     | -     | -     | -     | -     |
| Xenococcaceae            | 0.06 | -     | -     | -    | -     | -     | -     | -     | -     |
| Kocuria                  | 0.06 | -     | -     | -    | 0.03  | -     | -     | -     | -     |
| oc28                     | 0.06 | -     | -     | -    | -     | -     | -     | -     | -     |

|                              |       |       |      |      |       |       |       |       |       |
|------------------------------|-------|-------|------|------|-------|-------|-------|-------|-------|
| <i>Saccharopolyspora</i>     | 0.06  | <0.01 | -    | -    | -     | -     | -     | -     | -     |
| <i>Kineococcus</i>           | 0.05  | -     | -    | 0.29 | 0.01  | -     | -     | -     | <0.01 |
| PRR-10                       | 0.05  | -     | -    | -    | -     | -     | -     | -     | -     |
| <i>Rhodobacter</i>           | 0.05  | 0.44  | -    | 0.53 | -     | -     | -     | -     | -     |
| <i>Turicibacter</i>          | 0.05  | -     | -    | -    | -     | -     | -     | -     | -     |
| <i>Actinopolymorpha</i>      | 0.05  | -     | -    | -    | -     | -     | -     | -     | -     |
| AKIW874                      | 0.05  | -     | -    | -    | -     | -     | -     | -     | -     |
| <i>Butyricimonas</i>         | 0.05  | -     | -    | -    | -     | -     | -     | -     | <0.01 |
| Dorea                        | 0.05  | -     | -    | -    | 0.24  | <0.01 | -     | 0.03  | -     |
| Ktedonobacteraceae           | 0.05  | -     | -    | -    | -     | -     | -     | -     | -     |
| <i>Luteimonas</i>            | 0.05  | 0.12  | 0.01 | -    | -     | 0.02  | -     | -     | -     |
| <i>Streptosporangium</i>     | 0.05  | -     | -    | -    | -     | -     | -     | -     | -     |
| <i>Jeotgalicoccus</i>        | 0.04  | <0.01 | 0.02 | 0.24 | 0.09  | 0.01  | <0.01 | <0.01 | <0.01 |
| <i>Luteolibacter</i>         | 0.04  | -     | -    | -    | -     | -     | -     | -     | -     |
| Cytophagaceae                | 0.04  | 0.10  | -    | -    | -     | -     | -     | -     | -     |
| Ellin515                     | 0.04  | -     | -    | 0.24 | -     | -     | -     | -     | -     |
| [ <i>Barnesiellaceae</i> ]   | 0.03  | -     | -    | -    | -     | <0.01 | -     | -     | -     |
| <i>Curtobacterium</i>        | 0.03  | 0.11  | -    | 0.47 | 0.02  | -     | -     | -     | <0.01 |
| <i>Lentibacillus</i>         | 0.03  | 0.02  | 0.01 | 0.35 | 0.04  | 0.02  | -     | <0.01 | <0.01 |
| Chthonomonadaceae            | 0.03  | -     | -    | -    | -     | -     | -     | -     | -     |
| Chlamydomonadaceae           | 0.03  | -     | -    | -    | -     | -     | -     | -     | -     |
| Mycoplana                    | 0.03  | 0.02  | -    | -    | -     | 0.01  | -     | -     | -     |
| Myxococcaceae                | 0.03  | -     | -    | -    | -     | -     | -     | -     | -     |
| <i>Nitrosovibrio</i>         | 0.03  | -     | -    | -    | -     | -     | -     | -     | -     |
| <i>Steroidobacter</i>        | 0.03  | -     | -    | -    | -     | -     | -     | -     | -     |
| <i>Candidatus Solibacter</i> | 0.03  | -     | -    | -    | -     | -     | -     | -     | -     |
| Hyphomonadaceae              | 0.03  | -     | -    | -    | -     | -     | -     | -     | -     |
| Lachnospiraceae              | 0.03  | <0.01 | -    | -    | 0.79  | -     | -     | 0.09  | <0.01 |
| <i>Flavobacterium</i>        | 0.02  | 0.36  | -    | -    | -     | -     | -     | -     | -     |
| <i>Iamia</i>                 | 0.02  | -     | -    | -    | -     | -     | -     | -     | -     |
| <i>Labrys</i>                | 0.02  | -     | -    | -    | 0.02  | <0.01 | -     | -     | -     |
| 0319-6A21                    | 0.02  | -     | -    | -    | -     | -     | -     | 0.03  | -     |
| Aerococcaceae                | 0.01  | <0.01 | -    | -    | <0.01 | <0.01 | -     | <0.01 | <0.01 |
| <i>Janthinobacterium</i>     | 0.01  | 0.16  | -    | -    | -     | -     | -     | -     | -     |
| Peptostreptococcaceae        | 0.01  | -     | -    | -    | -     | <0.01 | -     | 0.02  | -     |
| <i>Ramlibacter</i>           | 0.01  | -     | -    | -    | -     | -     | -     | -     | -     |
| Caldilineaceae               | <0.01 | -     | -    | -    | -     | -     | -     | -     | -     |
| cc_115                       | <0.01 | -     | -    | -    | 0.07  | <0.01 | -     | -     | -     |

|                         |       |       |       |      |       |       |   |       |       |
|-------------------------|-------|-------|-------|------|-------|-------|---|-------|-------|
| <i>Delftia</i>          | <0.01 | -     | -     | -    | -     | -     | - | -     | -     |
| <i>Inquilinus</i>       | <0.01 | -     | -     | -    | -     | -     | - | -     | -     |
| Kineosporiaceae         | <0.01 | -     | -     | -    | 0.04  | <0.01 | - | -     | -     |
| OM60                    | <0.01 | -     | -     | -    | -     | -     | - | -     | -     |
| <i>Oscillochloris</i>   | <0.01 | -     | -     | -    | -     | -     | - | -     | -     |
| Pirellulaceae           | <0.01 | -     | -     | -    | -     | -     | - | -     | -     |
| <i>Veillonella</i>      | <0.01 | -     | -     | -    | -     | -     | - | -     | -     |
| Ruaniaceae              | <0.01 | -     | -     | -    | -     | -     | - | -     | -     |
| SMB53                   | <0.01 | -     | -     | -    | <0.01 | -     | - | -     | -     |
| <i>Cellulomonas</i>     | -     | 0.93  | -     | 0.06 | -     | -     | - | -     | -     |
| <i>Pigmentiphaga</i>    | -     | 0.67  | -     | 0.12 | -     | <0.01 | - | -     | -     |
| <i>Sanguibacter</i>     | -     | 0.66  | -     | -    | <0.01 | -     | - | -     | -     |
| Alcaligenaceae          | -     | 0.41  | -     | -    | -     | <0.01 | - | -     | <0.01 |
| Rhodobacteraceae        | -     | 0.12  | -     | 0.18 | -     | -     | - | -     | -     |
| <i>Saccharibacillus</i> | -     | 0.09  | -     | -    | -     | -     | - | -     | -     |
| Flavobacteriaceae       | -     | 0.05  | -     | -    | -     | -     | - | -     | -     |
| <i>Trabulsiella</i>     | -     | 0.03  | -     | -    | -     | -     | - | -     | -     |
| <i>Achromobacter</i>    | -     | 0.02  | -     | -    | -     | -     | - | -     | -     |
| <i>Salana</i>           | -     | 0.02  | -     | -    | -     | -     | - | -     | -     |
| <i>Serratia</i>         | -     | 0.02  | <0.01 | 0.12 | -     | -     | - | 0.06  | 0.06  |
| <i>Rhodococcus</i>      | -     | 0.02  | -     | 0.06 | 0.39  | -     | - | -     | -     |
| <i>Acidovorax</i>       | -     | 0.01  | -     | -    | -     | -     | - | -     | -     |
| <i>Dyadobacter</i>      | -     | 0.01  | -     | -    | -     | -     | - | -     | -     |
| <i>Enterobacter</i>     | -     | 0.01  | <0.01 | -    | -     | -     | - | -     | <0.01 |
| <i>Vibrio</i>           | -     | <0.01 | -     | -    | -     | -     | - | -     | -     |
| Cellulomonadaceae       | -     | <0.01 | -     | -    | -     | -     | - | -     | -     |
| <i>Facklamia</i>        | -     | <0.01 | -     | -    | -     | -     | - | -     | <0.01 |
| <i>Virgibacillus</i>    | -     | <0.01 | -     | -    | <0.01 | -     | - | -     | -     |
| Christensenellaceae     | -     | -     | <0.01 | -    | 0.05  | -     | - | <0.01 | -     |
| <i>Coproccoccus</i>     | -     | -     | -     | 0.24 | 0.24  | -     | - | -     | -     |
| <i>Roseomonas</i>       | -     | -     | -     | 0.18 | -     | -     | - | -     | <0.01 |
| <i>Larkinella</i>       | -     | -     | -     | 0.18 | -     | <0.01 | - | -     | -     |
| <i>Natronobacillus</i>  | -     | -     | -     | 0.12 | -     | -     | - | -     | -     |
| Cystobacterineae        | -     | -     | -     | 0.12 | 0.07  | -     | - | -     | -     |
| Enterococcaceae         | -     | -     | -     | 0.12 | -     | -     | - | <0.01 | -     |
| <i>Methylosinus</i>     | -     | -     | -     | 0.12 | -     | -     | - | -     | -     |
| <i>Anaerobacillus</i>   | -     | -     | -     | 0.06 | -     | -     | - | -     | -     |
| Erysipelotrichaceae     | -     | -     | -     | 0.06 | -     | -     | - | -     | -     |

|                              |   |   |   |      |       |       |       |       |       |
|------------------------------|---|---|---|------|-------|-------|-------|-------|-------|
| Planococcaceae               | - | - | - | 0.06 | -     | -     | -     | <0.01 | -     |
| <i>Parabacteroides</i>       | - | - | - | 0.06 | -     | -     | <0.01 | -     | <0.01 |
| <i>Rhodobaca</i>             | - | - | - | 0.06 | -     | <0.01 | -     | -     | <0.01 |
| Staphylococcaceae            | - | - | - | 0.06 | -     | -     | -     | -     | -     |
| <i>Treponema</i>             | - | - | - | -    | 0.33  | -     | -     | -     | -     |
| Veillonellaceae              | - | - | - | -    | 0.22  | -     | -     | 0.02  | -     |
| <i>Megasphaera</i>           | - | - | - | -    | 0.21  | -     | -     | -     | -     |
| <i>Ruminobacter</i>          | - | - | - | -    | 0.18  | -     | -     | -     | -     |
| Polyangiaceae                | - | - | - | -    | 0.17  | -     | -     | -     | -     |
| Nocardiopsaceae              | - | - | - | -    | 0.15  | <0.01 | -     | <0.01 | <0.01 |
| [Fimbriimonadaceae]          | - | - | - | -    | 0.11  | -     | -     | -     | -     |
| 0.104126706                  | - | - | - | -    | 0.10  | -     | -     | -     | -     |
| <i>Catenibacterium</i>       | - | - | - | -    | 0.08  | -     | -     | -     | -     |
| S24-7                        | - | - | - | -    | 0.06  | -     | -     | -     | -     |
| Gemellaceae                  | - | - | - | -    | 0.05  | -     | -     | -     | -     |
| <i>Brevibacillus</i>         | - | - | - | -    | 0.05  | -     | -     | -     | -     |
| <i>Bilophila</i>             | - | - | - | -    | 0.05  | -     | -     | -     | -     |
| [ <i>Prevotella</i> ]        | - | - | - | -    | 0.04  | -     | -     | -     | -     |
| <i>Rudanella</i>             | - | - | - | -    | 0.04  | -     | -     | -     | -     |
| <i>Micrococcus</i>           | - | - | - | -    | 0.04  | -     | -     | -     | <0.01 |
| <i>Succinivibrio</i>         | - | - | - | -    | 0.04  | <0.01 | -     | -     | -     |
| p-75-a5                      | - | - | - | -    | 0.03  | -     | -     | -     | -     |
| Frankiaceae                  | - | - | - | -    | 0.03  | <0.01 | -     | -     | -     |
| <i>Carnobacterium</i>        | - | - | - | -    | 0.03  | -     | -     | -     | -     |
| RFN20                        | - | - | - | -    | 0.03  | -     | -     | -     | -     |
| <i>Phascolarctobacterium</i> | - | - | - | -    | 0.03  | -     | -     | -     | -     |
| <i>Alcanivorax</i>           | - | - | - | -    | 0.02  | -     | -     | -     | -     |
| Candidatus Arthromitus       | - | - | - | -    | 0.02  | -     | -     | -     | -     |
| CF231                        | - | - | - | -    | 0.02  | -     | -     | -     | -     |
| <i>Caloramator</i>           | - | - | - | -    | 0.02  | -     | -     | -     | -     |
| <i>Sutterella</i>            | - | - | - | -    | <0.01 | -     | -     | -     | -     |
| <i>Klebsiella</i>            | - | - | - | -    | <0.01 | <0.01 | -     | <0.01 | 0.02  |
| <i>Salinicoccus</i>          | - | - | - | -    | <0.01 | <0.01 | 0.01  | -     | <0.01 |
| <i>Xiphinematobacter</i>     | - | - | - | -    | -     | <0.01 | -     | -     | -     |
| <i>Nannocystis</i>           | - | - | - | -    | -     | <0.01 | -     | -     | -     |
| Aeromonadaceae               | - | - | - | -    | -     | <0.01 | -     | -     | -     |
| <i>Aneurinibacillus</i>      | - | - | - | -    | -     | <0.01 | -     | -     | -     |
| <i>Aerococcus</i>            | - | - | - | -    | -     | <0.01 | -     | -     | <0.01 |



[illegible]

**Table S2:** The relative abundance (%) of fungi and bacteria during the inoculated fermentation process

| Microorganisms             | Fermentation time (h) |       |       |       |
|----------------------------|-----------------------|-------|-------|-------|
|                            | 0                     | 8     | 19    | 24    |
| <i>Fungi</i>               |                       |       |       |       |
| <i>Pichia</i>              | 70.37                 | 80.88 | 77.92 | 74.21 |
| Saccharomycetales          | 28.83                 | 18.31 | 20.27 | 14.54 |
| <i>Cladosporium</i>        | 0.23                  | 0.24  | 0.29  | 1.59  |
| Tremellales                | 0.13                  | <0.01 | <0.01 | <0.01 |
| <i>Trichosporon</i>        | 0.09                  | 0.03  | 0.03  | 0.30  |
| <i>Colletotrichum</i>      | 0.06                  | 0.06  | 0.11  | 1.94  |
| <i>Fusarium</i>            | 0.05                  | 0.07  | 0.16  | 0.72  |
| <i>Wickerhamomyces</i>     | 0.03                  | 0.02  | 0.02  | 0.02  |
| Other                      | 0.03                  | 0.02  | 0.14  | 0.32  |
| <i>Torulaspora</i>         | 0.02                  | 0.02  | 0.03  | 0.03  |
| <i>Kodamaea</i>            | 0.02                  | -     | <0.01 | <0.01 |
| Mycosphaerellaceae         | 0.02                  | 0.14  | 0.47  | 5.49  |
| Dothioraceae               | 0.02                  | 0.03  | 0.02  | 0.09  |
| Pleosporales               | 0.01                  | 0.02  | 0.09  | 0.02  |
| Unidentified               | <0.01                 | 0.02  | 0.03  | <0.01 |
| <i>Strelitziana</i>        | <0.01                 | <0.01 | <0.01 | 0.08  |
| <i>Cutaneotrichosporon</i> | <0.01                 | -     | -     | -     |
| <i>Issatchenkia</i>        | <0.01                 | <0.01 | <0.01 | <0.01 |
| Helotiales                 | <0.01                 | -     | <0.01 | <0.01 |
| <i>Cystofilobasidium</i>   | <0.01                 | <0.01 | -     | -     |
| <i>Didymella</i>           | <0.01                 | <0.01 | 0.05  | <0.01 |
| <i>Hannaella</i>           | <0.01                 | -     | -     | -     |
| <i>Aureobasidium</i>       | <0.01                 | <0.01 | -     | <0.01 |
| Chaetothyriales            | <0.01                 | <0.01 | 0.02  | <0.01 |
| Montagnulaceae             | <0.01                 | <0.01 | -     | -     |
| <i>Helicoma</i>            | <0.01                 | <0.01 | <0.01 | 0.16  |
| <i>Purpureocillium</i>     | <0.01                 | <0.01 | <0.01 | <0.01 |
| <i>Saccharomyces</i>       | <0.01                 | <0.01 | 0.07  | <0.01 |
| <i>Hanseniaspora</i>       | <0.01                 | -     | -     | <0.01 |
| <i>Lycoperdon</i>          | <0.01                 | -     | -     | -     |
| <i>Trichoderma</i>         | <0.01                 | -     | <0.01 | <0.01 |
| <i>Aspergillus</i>         | <0.01                 | <0.01 | 0.01  | -     |
| <i>Chaetomium</i>          | <0.01                 | -     | <0.01 | <0.01 |
| Dermateaceae               | <0.01                 | -     | -     | -     |
| Ganodermataceae            | <0.01                 | -     | -     | -     |
| Hypocreaceae               | <0.01                 | -     | -     | -     |
| <i>Hypocreales</i>         | <0.01                 | -     | <0.01 | 0.01  |
| <i>Kazachstania</i>        | <0.01                 | -     | <0.01 | 0.02  |
| <i>Metacordyceps</i>       | <0.01                 | -     | -     | -     |
| Nectriaceae                | <0.01                 | <0.01 | <0.01 | 0.05  |
| <i>Onygenales</i>          | <0.01                 | -     | -     | -     |
| <i>Rhizophydiales</i>      | <0.01                 | -     | -     | -     |
| <i>Rhizopogon</i>          | <0.01                 | -     | -     | -     |
| <i>Rhizopus</i>            | <0.01                 | -     | -     | -     |
| Saccharomycetaceae         | <0.01                 | <0.01 | <0.01 | -     |
| Sporormiaceae              | <0.01                 | -     | -     | -     |

|                           |       |       |       |       |
|---------------------------|-------|-------|-------|-------|
| <i>Talaromyces</i>        | <0.01 | <0.01 | <0.01 | 0.06  |
| <i>Trechispora</i>        | -     | 0.02  | -     | -     |
| <i>Phaeococcoomyces</i>   | -     | <0.01 | -     | -     |
| <i>Exophiala</i>          | -     | <0.01 | <0.01 | -     |
| <i>Penicillium</i>        | -     | <0.01 | -     | <0.01 |
| <i>Diaporthaceae</i>      | -     | <0.01 | -     | -     |
| <i>Malassezia</i>         | -     | <0.01 | -     | -     |
| <i>Pseudophialophora</i>  | -     | <0.01 | -     | -     |
| <i>Chaetomiaceae</i>      | -     | <0.01 | <0.01 | -     |
| <i>Schizoparmaceae</i>    | -     | <0.01 | -     | -     |
| <i>Gongronella</i>        | -     | <0.01 | 0.02  | <0.01 |
| <i>Thermomyces</i>        | -     | <0.01 | -     | -     |
| <i>Schizoporaceae</i>     | -     | <0.01 | -     | -     |
| <i>Clohesyomyces</i>      | -     | <0.01 | -     | <0.01 |
| <i>Capnodiales</i>        | -     | <0.01 | -     | <0.01 |
| <i>Mortierella</i>        | -     | -     | 0.02  | 0.01  |
| <i>Xylaria</i>            | -     | <0.01 | -     | -     |
| <i>Cyphellophora</i>      | -     | <0.01 | <0.01 | -     |
| <i>Alternaria</i>         | -     | -     | 0.02  | <0.01 |
| <i>Scytalidium</i>        | -     | <0.01 | -     | -     |
| <i>Ceratobasidiaceae</i>  | -     | -     | <0.01 | -     |
| <i>Atractiellales</i>     | -     | -     | <0.01 | <0.01 |
| <i>Lasiosphaeriaceae</i>  | -     | -     | <0.01 | -     |
| <i>Dictyonema</i>         | -     | -     | <0.01 | -     |
| <i>Debaryomyces</i>       | -     | -     | <0.01 | 0.16  |
| <i>Conlarium</i>          | -     | -     | <0.01 | -     |
| <i>Chaetosphaeriaceae</i> | -     | -     | <0.01 | <0.01 |
| <i>Clitopilus</i>         | -     | -     | <0.01 | -     |
| <i>Ostropales</i>         | -     | -     | <0.01 | 0.12  |
| <i>Myrmecridium</i>       | -     | -     | <0.01 | -     |
| <i>Pleosporaceae</i>      | -     | -     | <0.01 | <0.01 |
| <i>Xylariales</i>         | -     | -     | <0.01 | <0.01 |
| <i>Cercospora</i>         | -     | -     | <0.01 | -     |
| <i>Archaeosporaceae</i>   | -     | -     | <0.01 | <0.01 |
| <i>Coniochaetales</i>     | -     | -     | <0.01 | -     |
| <i>Dothiorella</i>        | -     | -     | <0.01 | <0.01 |
| <i>Entolomataceae</i>     | -     | -     | <0.01 | -     |
| <i>Magnaporthaceae</i>    | -     | -     | <0.01 | <0.01 |
| <i>Conocybe</i>           | -     | -     | <0.01 | -     |
| <i>Galerella</i>          | -     | -     | <0.01 | -     |
| <i>Microdochium</i>       | -     | -     | <0.01 | <0.01 |
| <i>Junewangia</i>         | -     | -     | <0.01 | -     |
| <i>Lindgomycetaceae</i>   | -     | -     | <0.01 | <0.01 |
| <i>Trichocomaceae</i>     | -     | -     | <0.01 | <0.01 |
| <i>Rhizophagus</i>        | -     | -     | <0.01 | -     |
| <i>Sordariales</i>        | -     | -     | <0.01 | <0.01 |
| <i>Oidiodendron</i>       | -     | -     | <0.01 | -     |
| <i>Westerdykella</i>      | -     | -     | <0.01 | -     |
| <i>Meira</i>              | -     | -     | <0.01 | -     |
| <i>Glomeraceae</i>        | -     | -     | <0.01 | <0.01 |
| <i>Cercospora</i>         | -     | -     | -     | <0.01 |
| <i>Rhizophlyctis</i>      | -     | -     | -     | <0.01 |

|                         |       |       |       |       |
|-------------------------|-------|-------|-------|-------|
| Saccharomycetaceae      | -     | -     | -     | <0.01 |
| <i>Auriculariales</i>   | -     | -     | -     | <0.01 |
| <i>Phaeosphaeria</i>    | -     | -     | -     | <0.01 |
| <i>Diaporthe</i>        | -     | -     | -     | <0.01 |
| <i>Edenia</i>           | -     | -     | -     | <0.01 |
| <i>Curvularia</i>       | -     | -     | -     | <0.01 |
| <i>Lecanosticta</i>     | -     | -     | -     | <0.01 |
| <i>Glomus</i>           | -     | -     | -     | <0.01 |
| Lentitheciaceae         | -     | -     | -     | <0.01 |
| <i>Microstromatales</i> | -     | -     | -     | <0.01 |
| <i>Myrothecium</i>      | -     | -     | -     | <0.01 |
| <i>Passalora</i>        | -     | -     | -     | <0.01 |
| <i>Pestalotiopsis</i>   | -     | -     | -     | <0.01 |
| <i>Tetraplophaeria</i>  | -     | -     | -     | <0.01 |
| Thelephoraceae          | -     | -     | -     | <0.01 |
| <i>Sporidiobolales</i>  | -     | -     | -     | <0.01 |
| Tubeufiaceae            | -     | -     | -     | <0.01 |
| <i>Meyerozyma</i>       | -     | -     | -     | <0.01 |
| Bionectriaceae          | -     | -     | 0.02  | <0.01 |
| <i>Bacteria</i>         |       |       |       |       |
| Lactobacillaceae        | 45.13 | 59.38 | 77.04 | 77.40 |
| Enterobacteriaceae      | 23.85 | 0.45  | 5.67  | 5.17  |
| <i>Lactococcus</i>      | 10.11 | 17.05 | 5.37  | 3.38  |
| <i>Pediococcus</i>      | 9.42  | 6.69  | 6.98  | 6.28  |
| <i>Lactobacillus</i>    | 3.37  | 2.88  | 0.75  | 0.78  |
| <i>Other</i>            | 3.29  | 2.53  | 0.33  | 1.75  |
| <i>Erwinia</i>          | 1.97  | 8.55  | 2.81  | 3.20  |
| <i>Unassigned</i>       | 0.71  | 0.54  | 0.53  | 0.18  |
| Ruminococcaceae         | 0.38  | 0.16  | 0.06  | 0.07  |
| <i>Sphingomonas</i>     | 0.16  | 0.02  | <0.01 | <0.01 |
| <i>Corynebacterium</i>  | 0.14  | 0.03  | <0.01 | 0.14  |
| Lachnospiraceae         | 0.11  | 0.07  | 0.03  | 0.02  |
| <i>Leuconostoc</i>      | 0.07  | 0.22  | 0.05  | 0.20  |
| <i>Faecalibacterium</i> | 0.06  | 0.04  | 0.01  | <0.01 |
| Oxalobacteraceae        | 0.06  | -     | <0.01 | <0.01 |
| <i>Facklamia</i>        | 0.05  | 0.02  | <0.01 | 0.05  |
| <i>Methylobacterium</i> | 0.05  | 0.04  | <0.01 | 0.04  |
| <i>Prevotella</i>       | 0.05  | 0.11  | <0.01 | 0.01  |
| <i>Proteus</i>          | 0.05  | 0.04  | 0.07  | 0.04  |
| <i>Oscillospira</i>     | 0.05  | 0.05  | <0.01 | 0.02  |
| <i>Ruminococcus</i>     | 0.04  | 0.06  | 0.06  | 0.03  |
| Acetobacteraceae        | 0.04  | -     | -     | -     |
| <i>Bosea</i>            | 0.04  | -     | -     | -     |
| Methylobacteriaceae     | 0.04  | 0.03  | <0.01 | <0.01 |
| <i>Prevotella</i>       | 0.03  | 0.04  | <0.01 | <0.01 |
| <i>Agrobacterium</i>    | 0.03  | 0.01  | <0.01 | -     |
| <i>Spirosoma</i>        | 0.03  | -     | -     | -     |
| Erysipelotrichaceae     | 0.03  | <0.01 | <0.01 | <0.01 |
| <i>Ruminococcus</i>     | 0.03  | <0.01 | <0.01 | 0.01  |
| <i>Staphylococcus</i>   | 0.03  | -     | -     | 0.01  |
| <i>Dietzia</i>          | 0.02  | <0.01 | -     | 0.04  |
| Phyllobacteriaceae      | 0.02  | -     | -     | -     |

|                              |       |       |       |       |
|------------------------------|-------|-------|-------|-------|
| <i>Brachybacterium</i>       | 0.02  | 0.02  | <0.01 | 0.06  |
| <i>Clostridium</i>           | 0.02  | -     | <0.01 | <0.01 |
| <i>Ochrobactrum</i>          | 0.02  | <0.01 | <0.01 | <0.01 |
| <i>Acinetobacter</i>         | 0.02  | -     | <0.01 | -     |
| <i>Brevibacterium</i>        | 0.02  | 0.03  | <0.01 | 0.10  |
| <i>Dorea</i>                 | 0.02  | -     | <0.01 | -     |
| Ectothiorhodospiraceae       | 0.02  | -     | -     | -     |
| <i>Fructobacillus</i>        | 0.02  | 0.04  | 0.02  | 0.04  |
| <i>Luteibacter</i>           | 0.02  | -     | -     | -     |
| Rhodospirillaceae            | 0.02  | -     | -     | -     |
| <i>Salinicoccus</i>          | 0.02  | -     | -     | -     |
| Bacillaceae                  | 0.01  | -     | -     | -     |
| Bradyrhizobiaceae            | 0.03  | -     | -     | <0.01 |
| <i>Clostridiaceae</i>        | 0.04  | 0.02  | <0.01 | <0.01 |
| <i>Coprococcus</i>           | 0.01  | <0.01 | -     | <0.01 |
| Micrococcaceae               | 0.01  | -     | -     | -     |
| <i>p-75-a5</i>               | 0.01  | <0.01 | <0.01 | <0.01 |
| <i>Phascolarctobacterium</i> | 0.01  | 0.01  | <0.01 | -     |
| <i>Succinivibrio</i>         | 0.01  | 0.05  | <0.01 | -     |
| <i>Turicibacter</i>          | 0.01  | -     | <0.01 | <0.01 |
| <i>Williamsia</i>            | 0.01  | -     | -     | -     |
| Planococcaceae               | 0.01  | <0.01 | -     | <0.01 |
| <i>Eubacterium</i>           | <0.01 | -     | -     | -     |
| <i>Acetobacter</i>           | <0.01 | -     | <0.01 | -     |
| <i>Achromobacter</i>         | <0.01 | -     | -     | -     |
| <i>Aerococcus</i>            | <0.01 | -     | -     | -     |
| Aurantimonadaceae            | <0.01 | -     | -     | -     |
| <i>Balneimonas</i>           | <0.01 | -     | -     | -     |
| CF231                        | <0.01 | -     | -     | -     |
| <i>Chryseobacterium</i>      | <0.01 | -     | -     | -     |
| Comamonadaceae               | <0.01 | -     | -     | -     |
| Ellin6075                    | <0.01 | 0.01  | -     | -     |
| <i>Gordonia</i>              | <0.01 | -     | -     | -     |
| <i>Hymenobacter</i>          | <0.01 | -     | -     | -     |
| <i>Jeotgalicoccus</i>        | <0.01 | -     | -     | 0.06  |
| Leuconostocaceae             | <0.01 | 0.08  | 0.06  | 0.19  |
| <i>Microbacterium</i>        | <0.01 | -     | -     | -     |
| <i>Mycobacterium</i>         | <0.01 | -     | -     | -     |
| <i>Novosphingobium</i>       | <0.01 | -     | -     | -     |
| Piscirickettsiaceae          | <0.01 | -     | -     | -     |
| <i>Pseudoclavibacter</i>     | <0.01 | -     | -     | <0.01 |
| <i>Rathayibacter</i>         | <0.01 | -     | -     | -     |
| <i>Serratia</i>              | <0.01 | 0.02  | <0.01 | <0.01 |
| <i>Sphingobacterium</i>      | <0.01 | 0.07  | <0.01 | 0.13  |
| <i>Synechococcus</i>         | <0.01 | -     | -     | -     |
| <i>Campylobacter</i>         | <0.01 | <0.01 | <0.01 | <0.01 |
| Desulfobacteraceae           | <0.01 | <0.01 | -     | -     |
| <i>Paracoccus</i>            | <0.01 | <0.01 | -     | <0.01 |
| <i>Pedobacter</i>            | <0.01 | <0.01 | -     | -     |
| Peptostreptococcaceae        | <0.01 | -     | <0.01 | -     |
| <i>Roseburia</i>             | <0.01 | -     | <0.01 | <0.01 |
| Sphingomonadaceae            | <0.01 | -     | -     | <0.01 |

|                               |       |       |       |       |
|-------------------------------|-------|-------|-------|-------|
| <i>Stenotrophomonas</i>       | <0.01 | <0.01 | <0.01 | <0.01 |
| <i>Weissella</i>              | <0.01 | -     | <0.01 | <0.01 |
| <i>Streptococcus</i>          | -     | 0.22  | -     | 0.02  |
| <i>Brevibacillus</i>          | -     | 0.11  | -     | -     |
| <i>Anaerovibrio</i>           | -     | 0.04  | <0.01 | <0.01 |
| <i>Enterobacter</i>           | -     | 0.03  | <0.01 | <0.01 |
| <i>Luteimonas</i>             | -     | 0.03  | -     | 0.07  |
| <i>Pseudomonas</i>            | -     | 0.03  | <0.01 | 0.01  |
| <i>S24-7</i>                  | -     | 0.03  | <0.01 | -     |
| <i>Burkholderia</i>           | -     | 0.02  | <0.01 | 0.05  |
| <i>Enterococcus</i>           | -     | 0.02  | <0.01 | 0.12  |
| Methylocystaceae              | -     | 0.02  | <0.01 | <0.01 |
| <i>Terriglobus</i>            | -     | 0.02  | -     | -     |
| Enterococcaceae               | -     | 0.01  | <0.01 | -     |
| <i>Megasphaera</i>            | -     | 0.01  | -     | -     |
| <i>Pantoea</i>                | -     | 0.01  | -     | -     |
| <i>Pelosinus</i>              | -     | 0.01  | -     | -     |
| <i>Bulleidia</i>              | -     | <0.01 | -     | <0.01 |
| <i>Citrobacter</i>            | -     | <0.01 | -     | <0.01 |
| <i>Fusobacterium</i>          | -     | <0.01 | <0.01 | -     |
| <i>Selenomonas</i>            | -     | <0.01 | <0.01 | <0.01 |
| Xenococcaceae                 | -     | <0.01 | -     | <0.01 |
| <i>RF16</i>                   | -     | -     | <0.01 | -     |
| <i>Bdellovibrio</i>           | -     | -     | <0.01 | <0.01 |
| <i>Mycoplana</i>              | -     | -     | <0.01 | -     |
| Rhizobiaceae                  | -     | -     | <0.01 | -     |
| <i>Trabulsiella</i>           | -     | -     | <0.01 | -     |
| <i>Dysgonomonas</i>           | -     | -     | <0.01 | <0.01 |
| <i>Lysobacter</i>             | -     | -     | <0.01 | 0.02  |
| Sphingobacteriaceae           | -     | -     | <0.01 | 0.05  |
| <i>Delftia</i>                | -     | -     | -     | 0.01  |
| <i>Oligella</i>               | -     | -     | -     | 0.01  |
| <i>Sporosarcina</i>           | -     | -     | -     | 0.01  |
| Aerococcaceae                 | -     | -     | -     | <0.01 |
| Alcaligenaceae                | -     | -     | -     | <0.01 |
| <i>Candidatus Arthromitus</i> | -     | -     | -     | <0.01 |
| <i>Candidatus Koribacter</i>  | -     | -     | -     | <0.01 |
| Coriobacteriaceae             | -     | -     | -     | <0.01 |
| <i>Kaistobacter</i>           | -     | -     | -     | <0.01 |
| Neisseriaceae                 | -     | -     | -     | <0.01 |
| <i>Blautia</i>                | -     | -     | -     | <0.01 |
| Brucellaceae                  | -     | -     | -     | <0.01 |
| Chitinophagaceae              | -     | -     | -     | <0.01 |
| Flavobacteriaceae             | -     | -     | -     | <0.01 |
| Isosphaeraceae                | -     | -     | -     | <0.01 |
| Rikenellaceae                 | -     | -     | -     | <0.01 |
| Sinobacteraceae               | -     | -     | -     | <0.01 |
| <i>Trichococcus</i>           | -     | -     | -     | <0.01 |
| vadinHB04                     | -     | -     | -     | <0.01 |
| Dermabacteraceae              | -     | -     | -     | <0.01 |
| Christensenellaceae           | -     | -     | -     | <0.01 |

---
